# Supplementary material for: Enhanced discharge capacity of thermorechargeable batteries composed of Cd-PBA and a potential-matched PBA
Source: Royal Society of Chemistry journal article supplement (doi:10.1039/d4se01843e), 2025-01-01
Supplement: d4se01843e1.pdf [file d4se01843e1.pdf]

**Enhanced discharge capacity of thermorechargeable battery composed of Cd-PBA and potential-matched PBA**

Yuuki Sakamoto<sup>1</sup> and Yutaka Moritomo<sup>1,2,3,4</sup>

<sup>1</sup> Graduate School of Pure & Applied Science, University of Tsukuba, Tsukuba, Ibaraki 305-7571, Japan

<sup>2</sup> Faculty of Pure & Applied Science, University of Tsukuba, Tsukuba, Ibaraki 305-7571, Japan

<sup>3</sup> Tsukuba Research Center for Energy Materials Science (TREMS), University of Tsukuba, Ibaraki 305-8571, Japan

**a. Co-PBA**

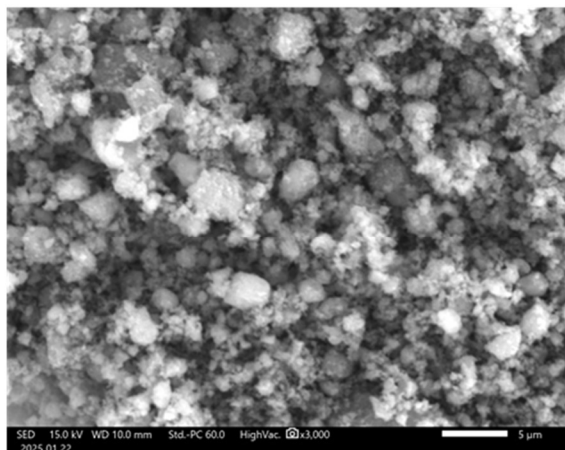

5  $\mu$  m

**b. CoMn-PBA**

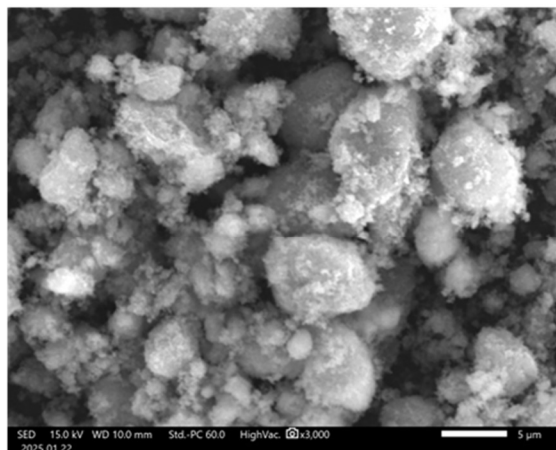

5  $\mu$  m

Fig. S1 SEM image of (a) CoMn-PBA and (b) Co-PBA

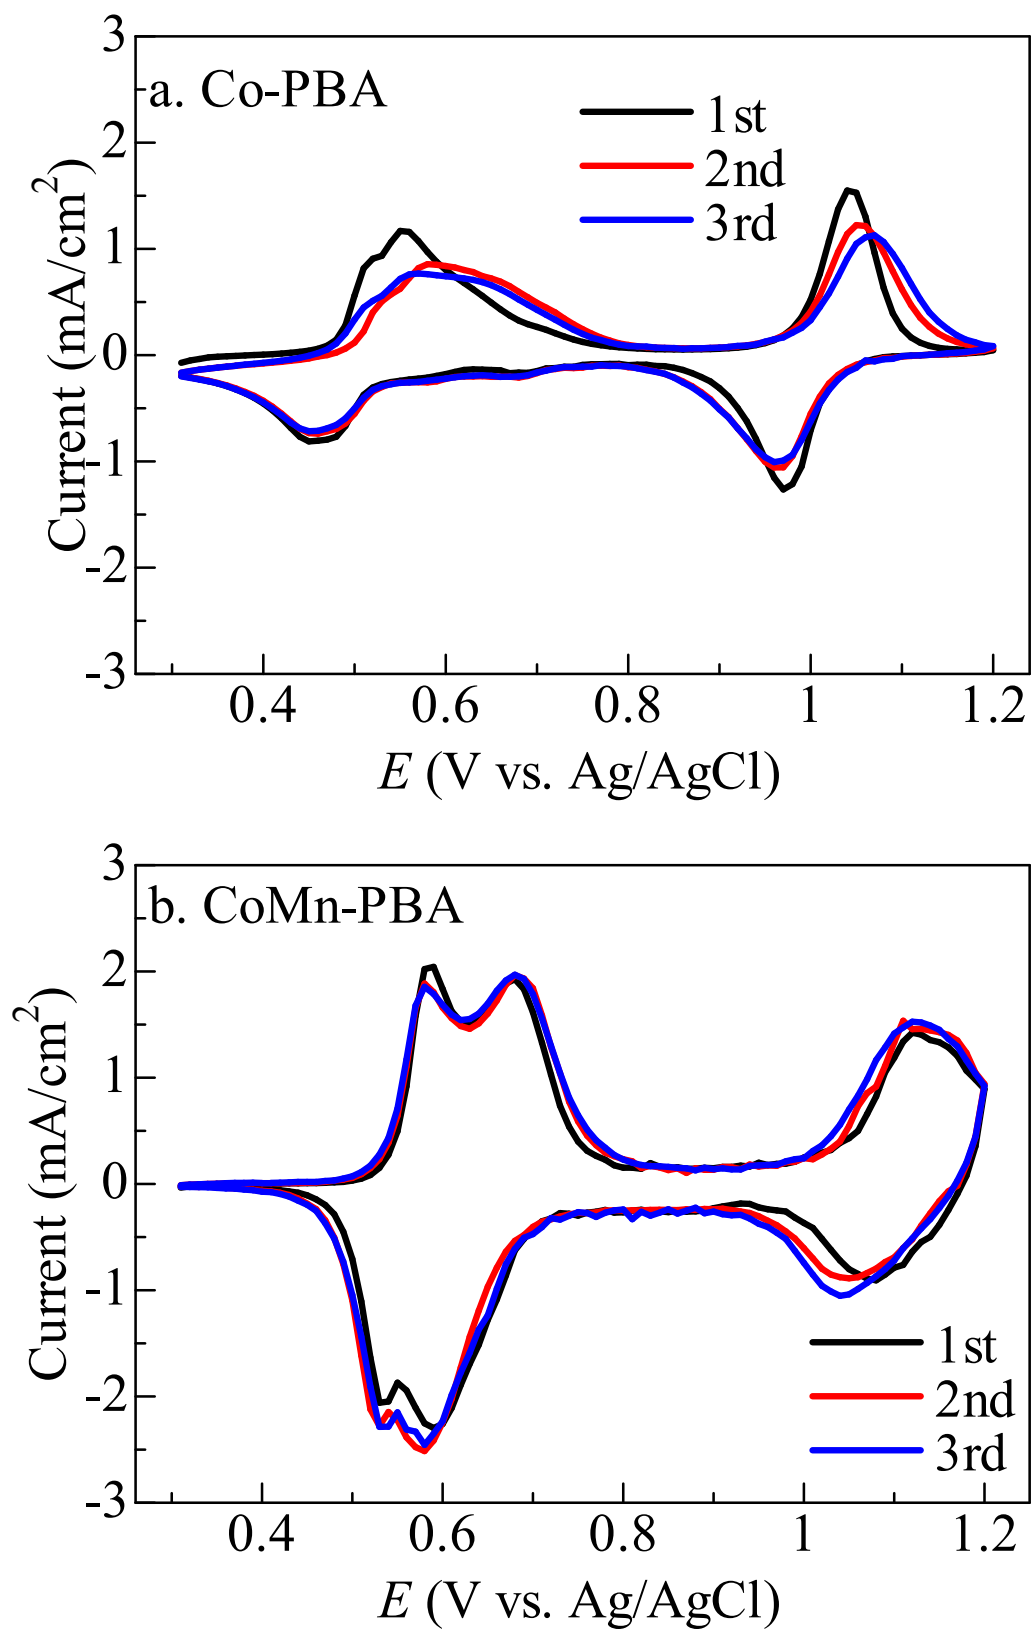

Fig. S2 Cyclic Voltammetry (CV) curve of (a) Co-PBA and (b) CoMn-PBA electrodes. The electrode area was  $1.0 \text{ cm}^2$ . The sweep rate of potential  $E$  was  $1.0 \text{ mV/s}$ .

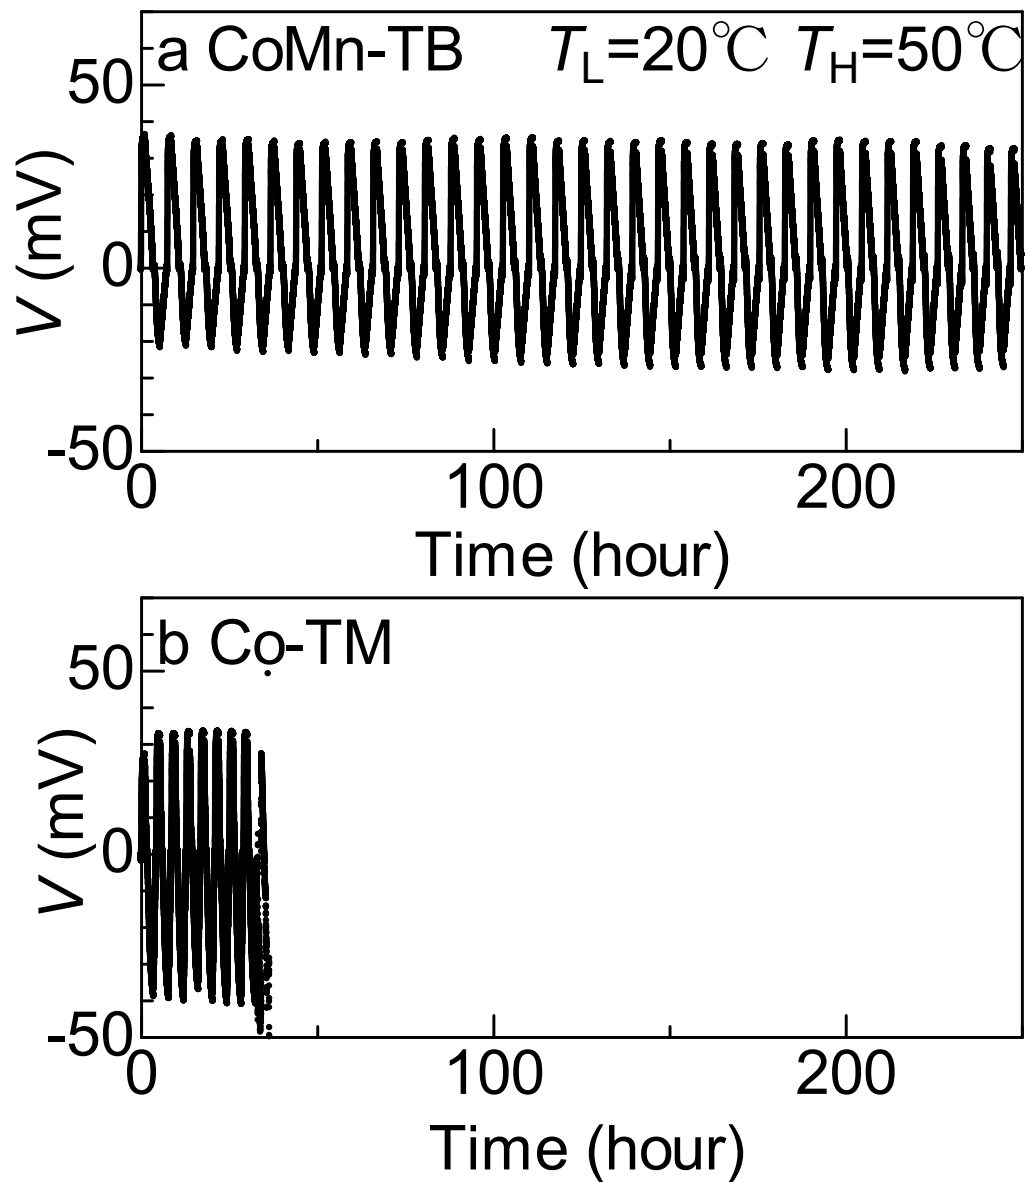

Fig. S3 Electromotive force  $V$  against time during the thermal cycle test between  $T_L$  ( $= 20^{\circ}\text{C}$ ) and  $T_H$  ( $= 50^{\circ}\text{C}$ ) in (a) CoMn-TB and (b) Co-TB. The thermal cycle test consists of four processes, i.e., heating from  $T_L$  to  $T_H$ , discharge at  $T_H$ , cooling from  $T_H$  to  $T_L$ , and discharge at  $T_L$ .

**a. CoMn-PBA**

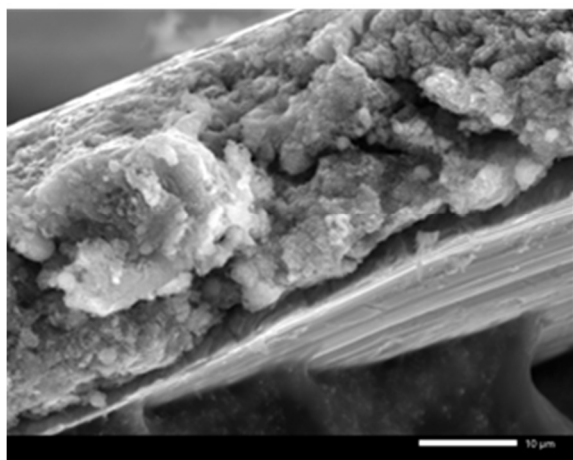

10  $\mu$  m

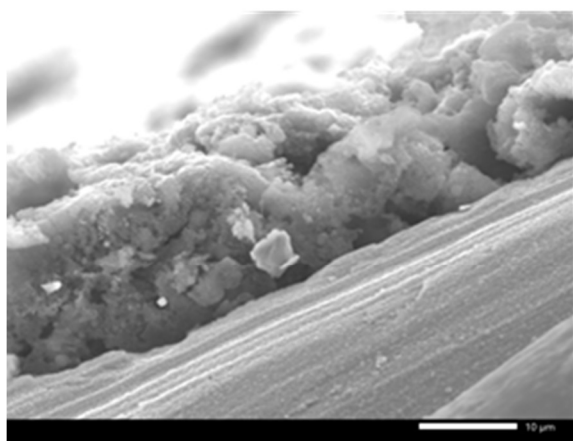

10  $\mu$  m

**b. Cd-PBA**

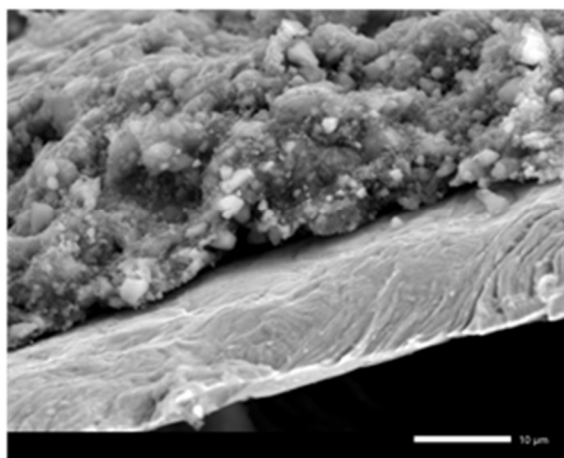

10  $\mu$  m

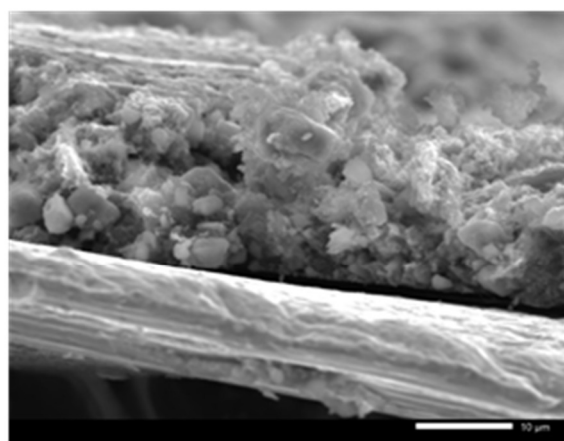

10  $\mu$  m

Fig. S4 cross sectional SEM images of (a) CoMn-PBA and (b) Cd-PBA electrodes. Upper and lower images are before and after a thermal cycle test, respectively.

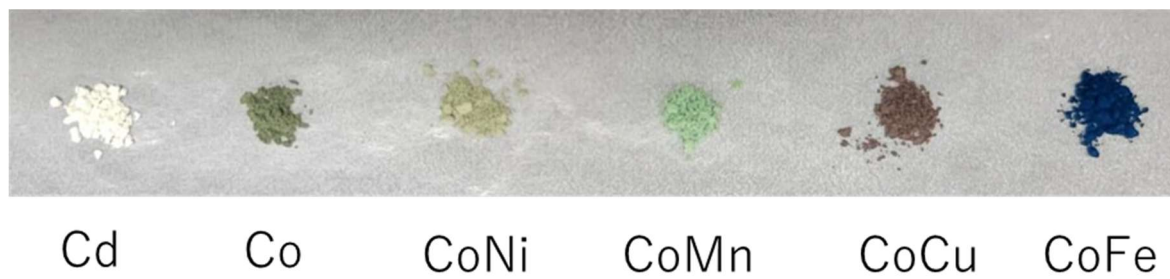

Fig. S5 Picture of the synthesized M-PBA (M = Cd, Co, CoNi, CoMn, CoCu, and CoFe).

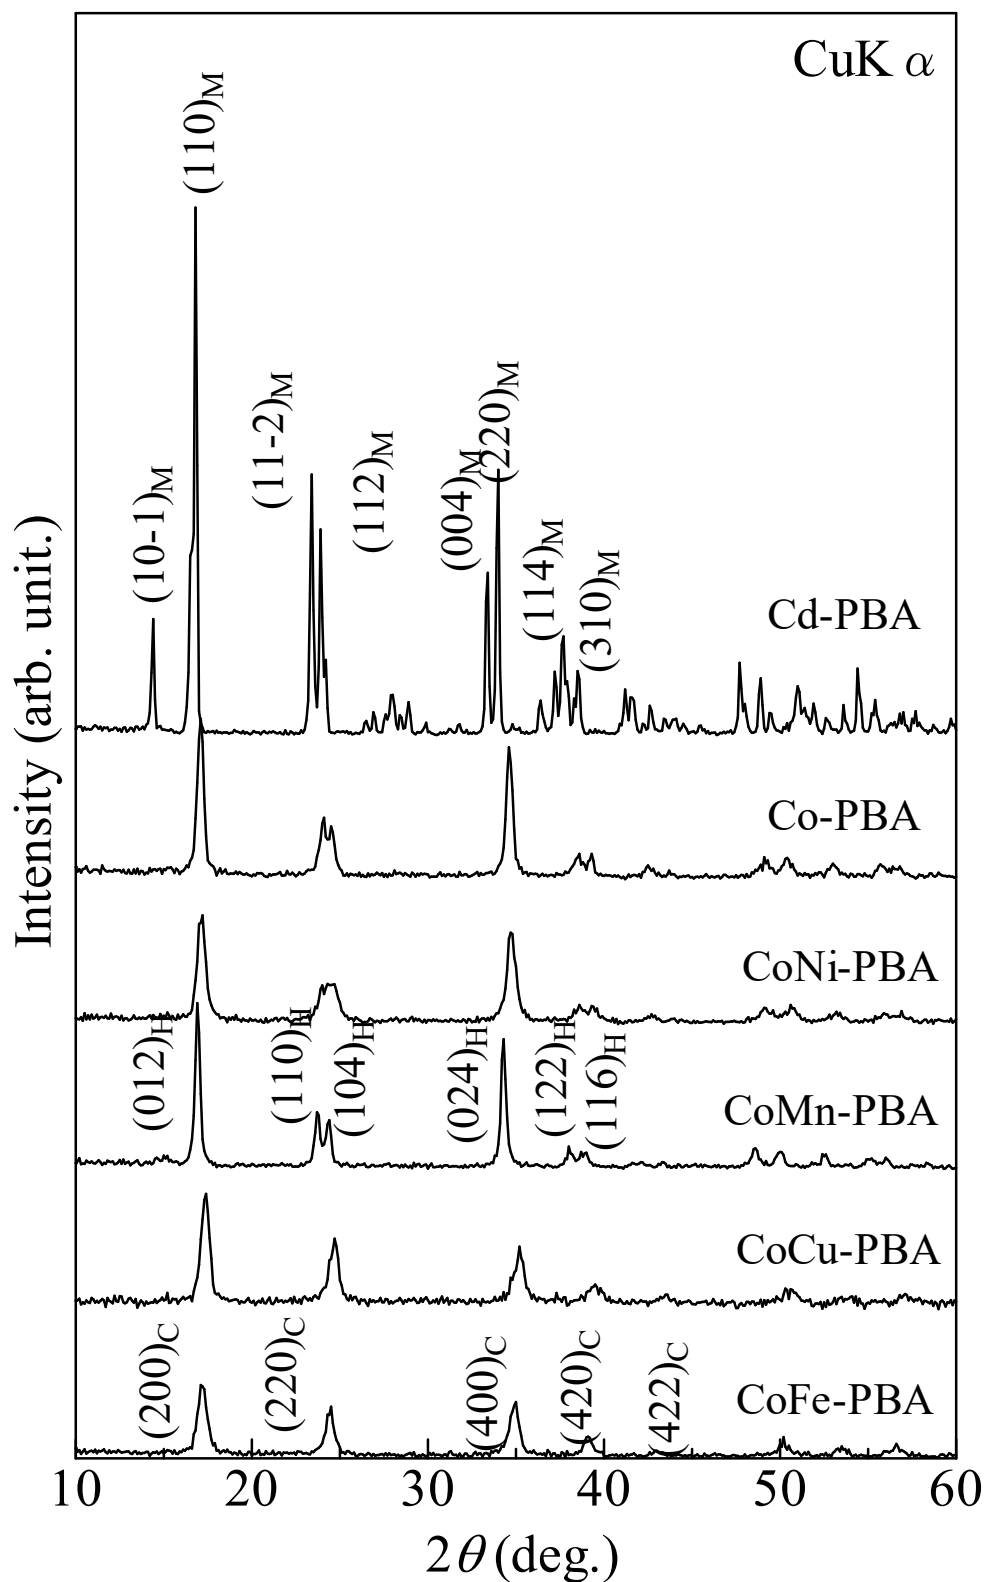

Fig. S6 X-ray diffraction pattern of M-PBA (M = Cd, Co, CoNi, CoMn, CoCu, and CoFe). The X-ray source was CuK $\alpha$ . The subscript M, C and H of the index stands for the monoclinic, face-centered cubic (fcc), and trigonal (hexagonal setting) cells, respectively

## The data supporting this article

Potential difference  $\Delta V$  against temperature difference  $\Delta T$  at 0.64 V vs. Ag/AgCl in M-PBA.

#Cd-PBA (ref.44)

# $\Delta T$  (K),  $\Delta V$  (mV)

5, -4.92

10, -10.6

15, -10.7

20, -24.3

#Co-PBA

# $\Delta T$  (K),  $\Delta V$  (mV)

5, 3.1

10, 5.2

15, 6.5

20, 6.9

#CoNi-PBA

# $\Delta T$  (K),  $\Delta V$  (mV)

5, -1.0

10, -2.8

15, -4.5

20, -6.4

#CoMn-PBA

# $\Delta T$  (K),  $\Delta V$  (mV)

5, 3.0

10, 6.5

15, 10.0

20, 13.8

#CoCu-PBA

# $\Delta T$  (K),  $\Delta V$  (mV)

5, -0.1

10, -1.1

15, -1.9

20, -2.9



#CoFe-PBA

# $\Delta T$  (K),  $\Delta V$  (mV)

5, 1.7

10, 3.5

15, 5.3

20, 6.4

Thermal voltage  $V_{TB}$  and discharge capacity  $Q_{TB}$  per unit weight of total active material against cycle number in CoMn-B and Co-TB.

#### #CoMn-TB

#cycle number,  $V_{TB}$  (mV) at  $T_H$ ,  $V_{TB}$  (mV) at  $T_L$ ,  $Q_{TB}$  (mAh g<sup>-1</sup>) at  $T_H$ ,  $Q_{TB}$  (mAh g<sup>-1</sup>) at  $T_L$ ,

1, 36.1, 21.6, 5.09, 4.33  
2, 35.7, 21.2, 5.01, 4.16  
3, 34.5, 21.8, 4.81, 4.27  
4, 34.6, 22.5, 4.83, 4.37  
5, 34.6, 22.5, 4.87, 4.27  
6, 34.9, 23.0, 4.77, 4.27  
7, 34.2, 22.5, 4.71, 4.32  
8, 33.9, 23.3, 4.70, 4.36  
9, 34.1, 23.7, 4.71, 4.42  
10, 34.2, 23.7, 4.72, 4.39  
11, 34.0, 24.3, 4.71, 4.47  
12, 34.7, 24.6, 4.79, 4.56  
13, 34.8, 25.5, 4.77, 4.56  
14, 34.8, 25.5, 4.78, 4.64  
15, 35.2, 25.7, 4.81, 4.64  
16, 35.3, 26.2, 4.79, 4.51  
17, 34.4, 26.5, 4.65, 4.53  
18, 34.5, 26.3, 4.65, 4.48  
19, 34.1, 26.8, 4.57, 4.50  
20, 34.1, 26.8, 4.55, 4.52  
21, 34.5, 27.2, 4.60, 4.45  
22, 34.0, 27.1, 4.49, 4.39  
23, 33.6, 27.3, 4.46, 4.41  
24, 33.6, 27.2, 4.44, 4.41  
25, 33.7, 27.3, 4.47, 4.40  
26, 33.4, 27.2, 4.43, 4.55  
27, 34.5, 28.0, 4.58, 4.60  
28, 34.5, 28.0, 4.58, 4.52  
29, 34.2, 27.9, 4.50, 4.50  
30, 34.3, 27.9, 4.52, 4.48

#### #Co-TB

#cycle number,  $V_{TB}$  (mV) at  $T_H$ ,  $V_{TB}$  (mV) at  $T_L$ ,  $Q_{TB}$  (mAh g<sup>-1</sup>) at  $T_H$ ,  $Q_{TB}$  (mAh g<sup>-1</sup>) at  $T_L$ ,

1, 27.1, 38.8, 0.84, 1.05  
2, 32.3, 39.5, 0.87, 1.01  
3, 32.0, 40.1, 0.81, 0.96  
4, 32.7, 37.0, 0.68, 0.81  
5, 32.8, 40.2, 0.73, 0.86  
6, 32.7, 40.9, 0.71, 0.83  
7, 32.7, 41.1, 0.68, 0.80  
8, 32.4, 40.9, 0.64, 0.67
